# Supplementary material for: Photoactivable Ruthenium-Based Coordination Polymer Nanoparticles for Light-Induced Chemotherapy
Source: MDPI journal article supplement (doi:10.3390/nano11113089), 2021-11-16
Supplement: s1 [file s1]

# Photoactivable Ruthenium-Based Coordination Polymer Nanoparticles for Light-Induced Chemotherapy

Junda Zhang <sup>1</sup>, Vadde Ramu <sup>2</sup>, Xue-Quan Zhou <sup>2</sup>, Carolina Frias <sup>1</sup>, Daniel Ruiz-Molina <sup>1</sup>, Sylvestre Bonnet <sup>2,\*</sup>, Claudio Roscini <sup>1,\*</sup> and Fernando Novio <sup>1,\*</sup>

<sup>1</sup> Catalan Institute of Nanoscience and Nanotechnology (ICN2), CSIC and BIST, Campus UAB, Bellaterra, 08193 Barcelona, Spain; [junda.zhang@icn2.cat](mailto:junda.zhang@icn2.cat) (J.Z.); [caarolina.frias@gmail.com](mailto:caarolina.frias@gmail.com) (C.F.); [dani.ruiz@icn2.cat](mailto:dani.ruiz@icn2.cat) (D.R.-M.)

<sup>2</sup> Leiden Institute of Chemistry, Universiteit Leiden, Einsteinweg 55, 2333 CC Leiden, The Netherlands; [ramuvadde1@gmail.com](mailto:ramuvadde1@gmail.com) (V.R.); [x.zhou@lic.leidenuniv.nl](mailto:x.zhou@lic.leidenuniv.nl) (X.-Q.Z.)

\* Correspondence: [bonnet@chem.leidenuniv.nl](mailto:bonnet@chem.leidenuniv.nl) (S.B.); [claudio.roschini@icn2.cat](mailto:claudio.roschini@icn2.cat) (C.R.); [fernando.novio@icn2.cat](mailto:fernando.novio@icn2.cat) (F.N.)

## Table of Contents

|                                                           |     |
|-----------------------------------------------------------|-----|
| 1. Characterization of the photoactivable materials ..... | S1  |
| 2. Photoirradiation studies .....                         | S7  |
| 3. <i>In vitro</i> studies .....                          | S11 |

## 1. Characterization of the photoactivable materials

### 1.1 $^1\text{H}$ and $^{13}\text{C}$ -NMR spectrum of complex **2**

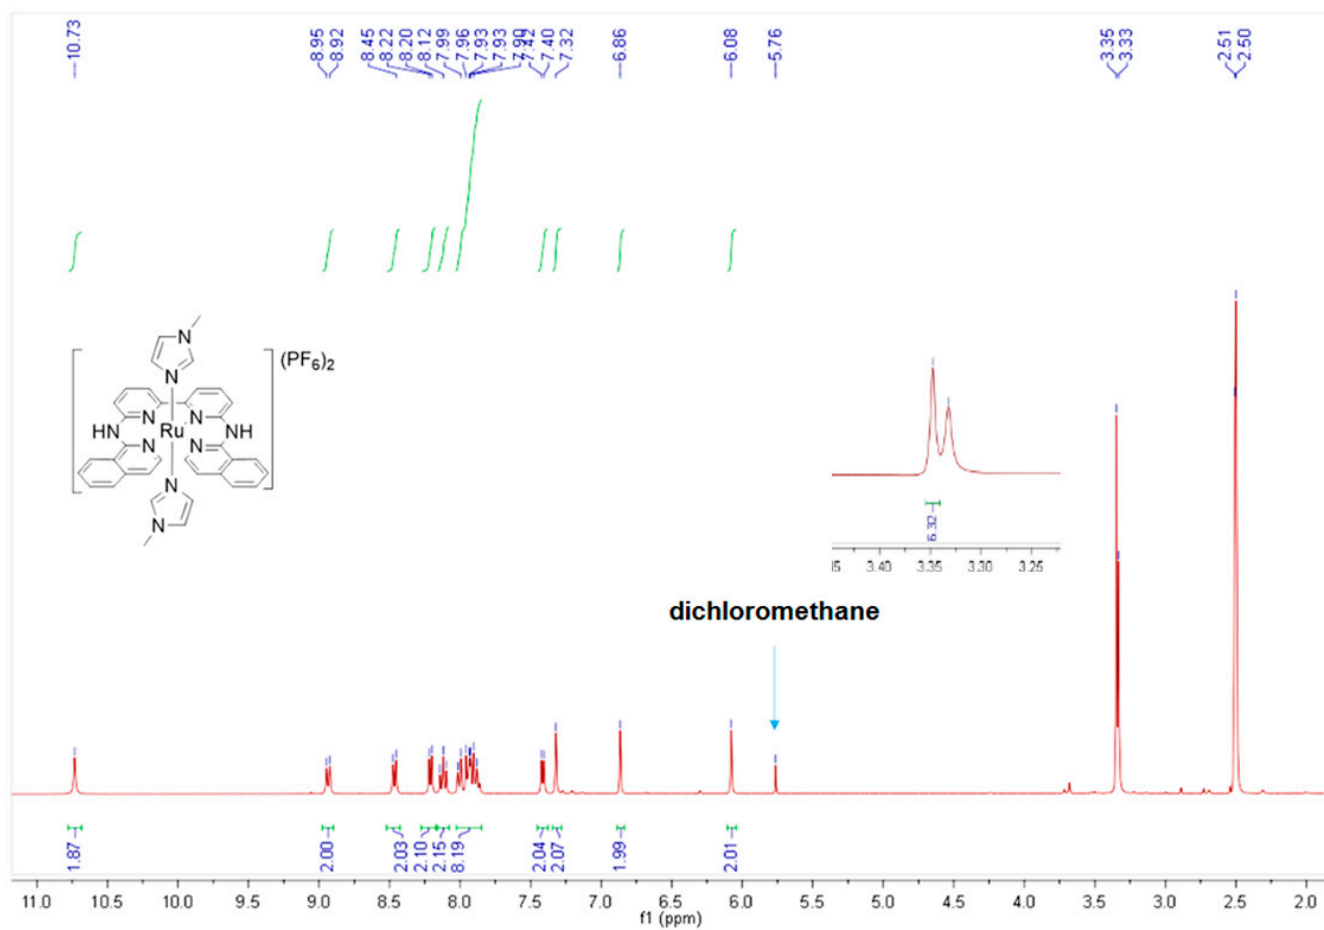

**Figure S1.**  $^1\text{H}$ -NMR spectrum of complex **2** in  $(\text{CD}_3)_2\text{SO}$ .

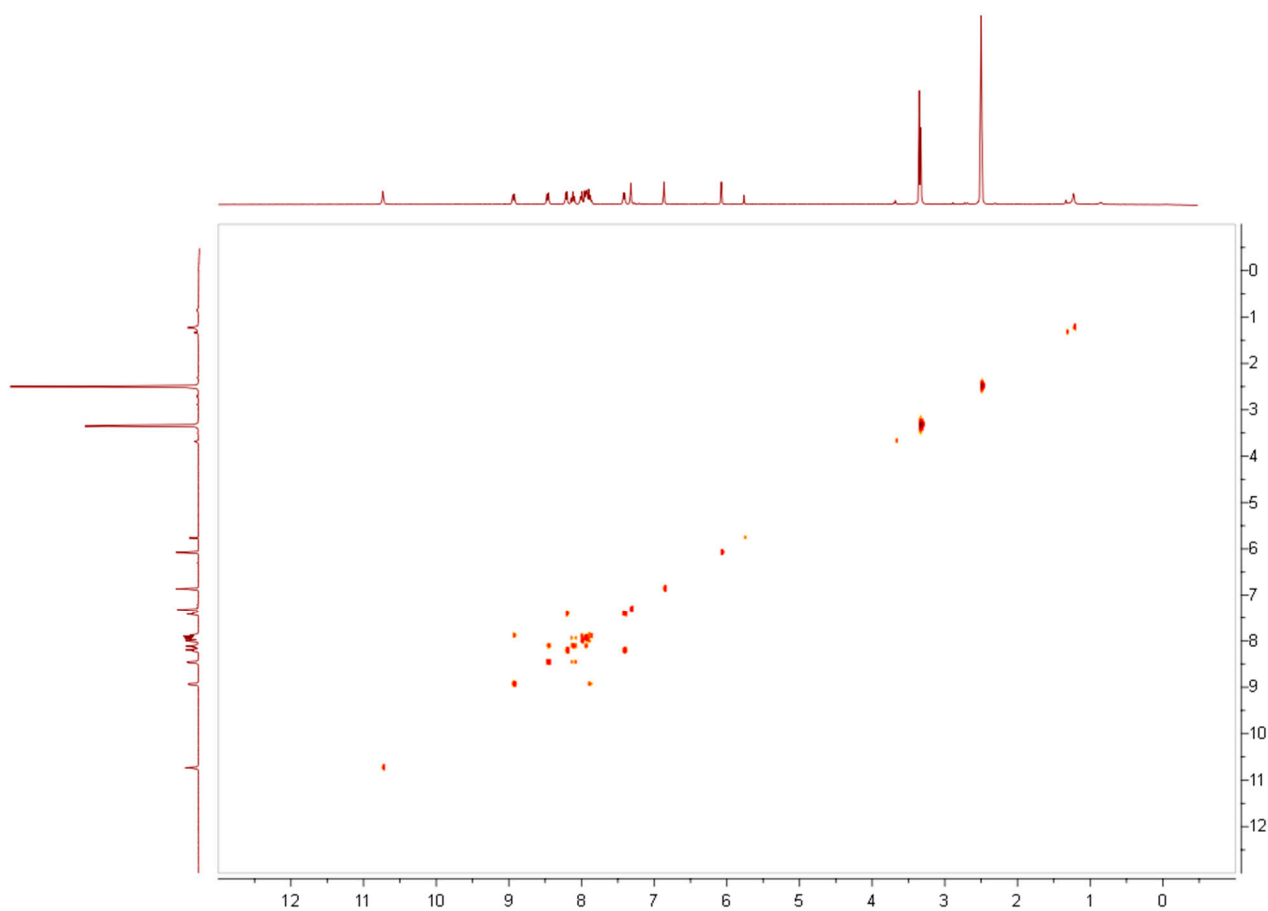

Figure S2. COSY spectrum of complex **2** in (CD<sub>3</sub>)<sub>2</sub>SO.

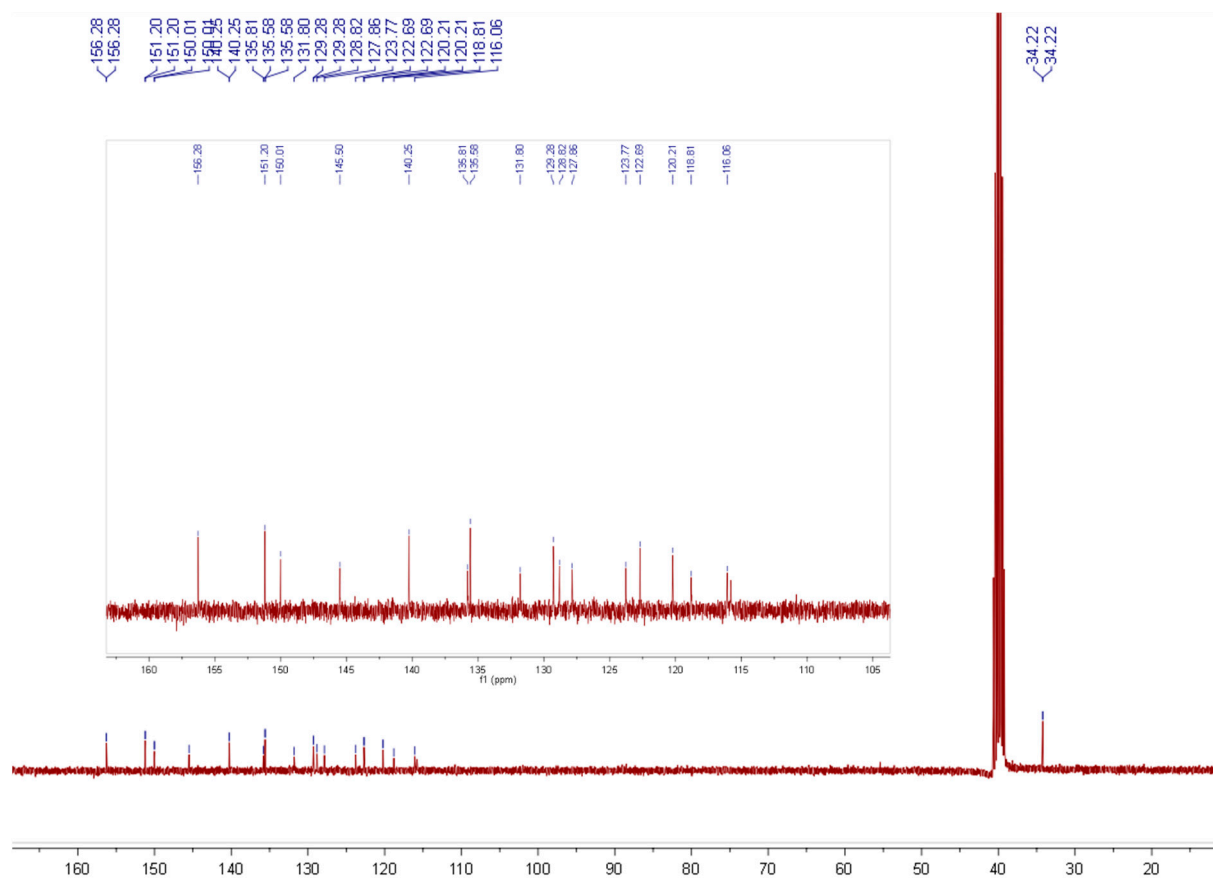

Figure S3. <sup>13</sup>C-NMR spectrum of complex **2** in (CD<sub>3</sub>)<sub>2</sub>SO.

## 1.2 Mass spectrum of complex 2

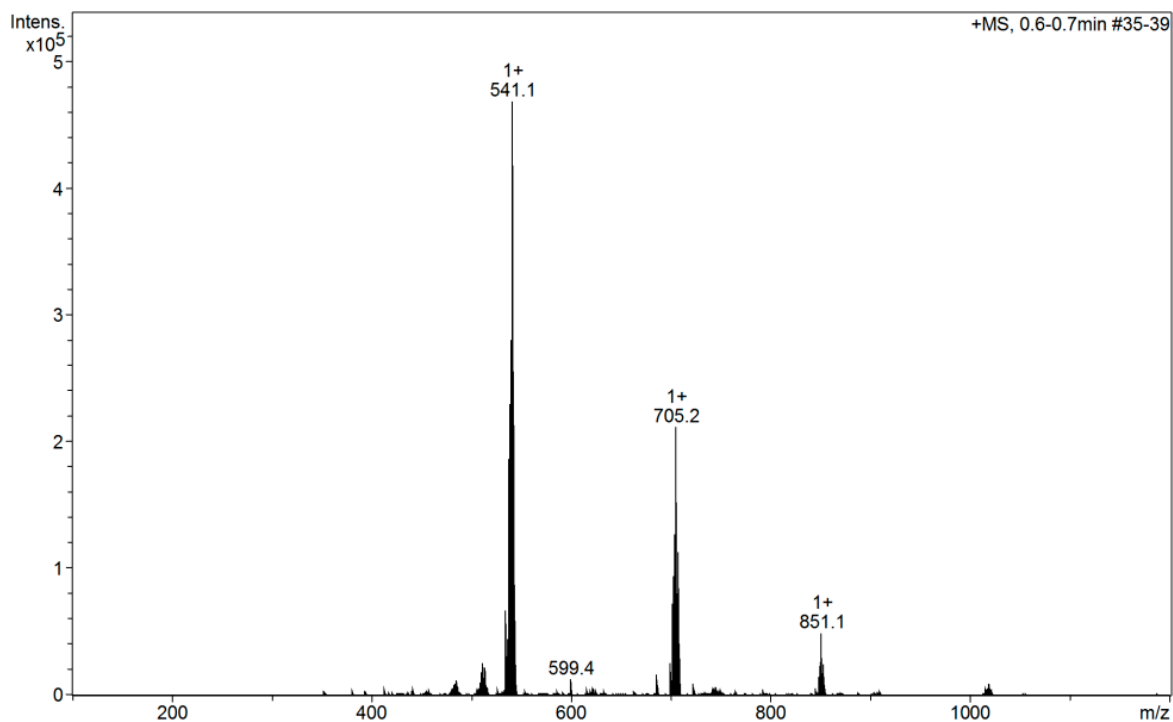

Figure S4. Mass spectrum of complex 2.

## 1.3 Fourier-transform infrared spectroscopy (FTIR) spectra

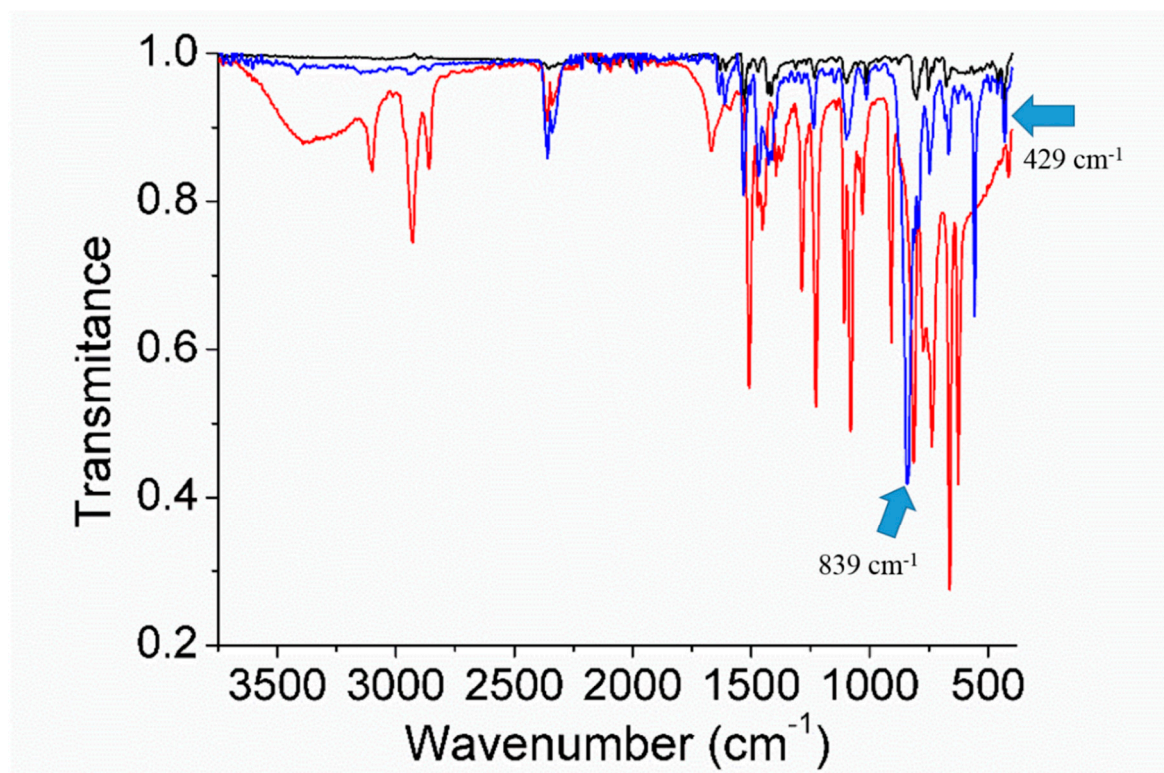

Figure S5. FTIR spectra of 1 (black), BIS ligand (red) and RuBIS CPNs (blue).

## 1.4 Dynamic Light Scattering (DLS)

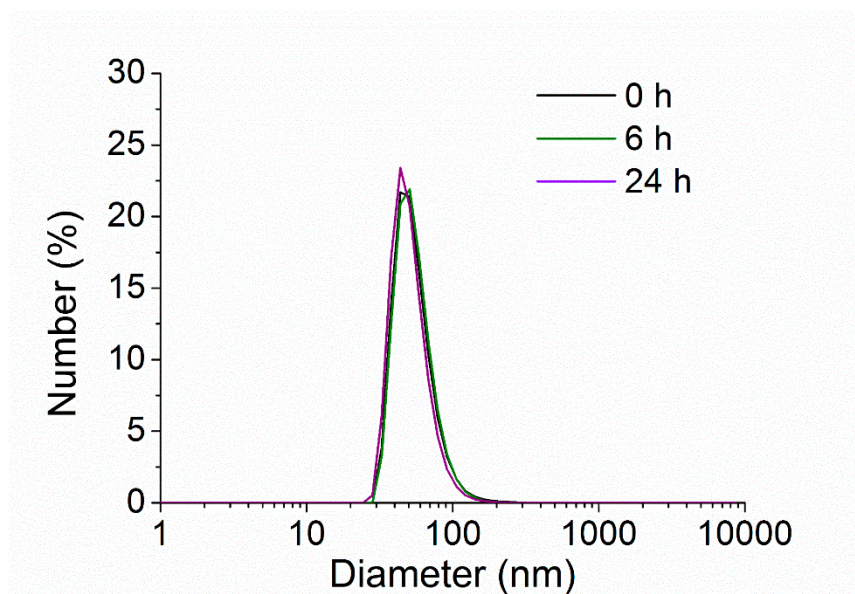

**Figure S6.** Time-dependent DLS measurements for a 50 µg/mL **RuBIS** CPNs solution in PBS buffer containing 20 mg/mL BSA.

### 1.5 Powder X-ray Diffraction (XRD)

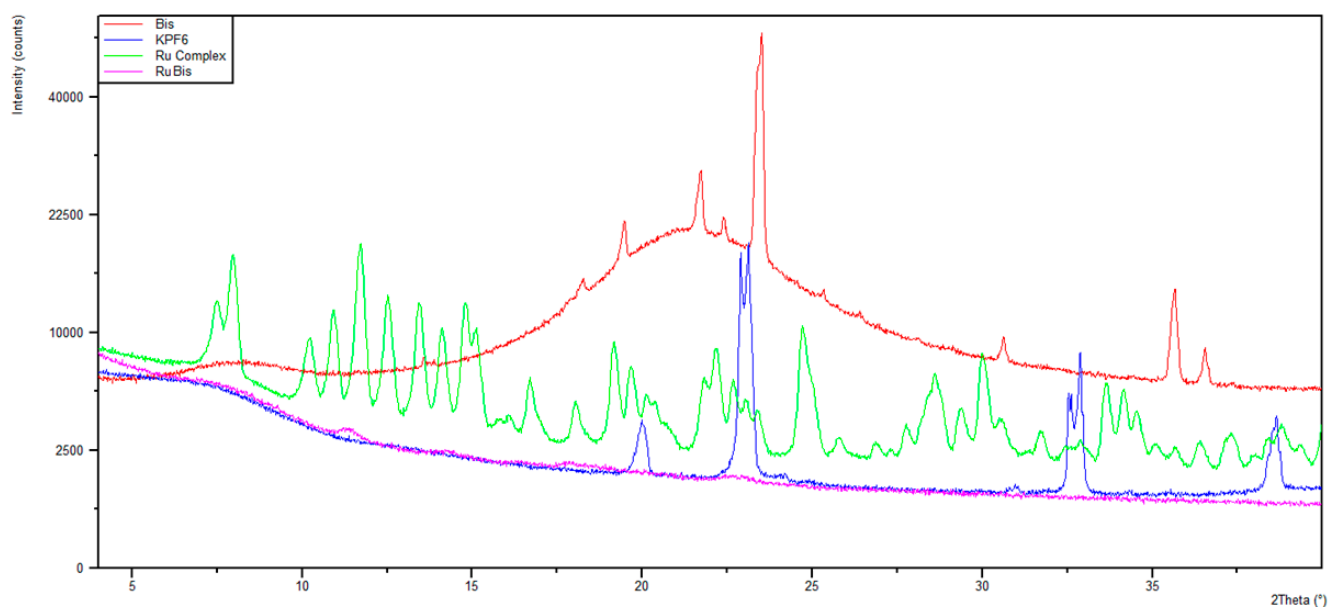

**Figure S7.** X-Ray Diffractometry of **BIS** ligand (red),  $KPF_6$  (blue), **1** (green), and **RuBIS** CPNs (pink).

### 1.6 Inductively coupled plasma (ICP) calibration curve

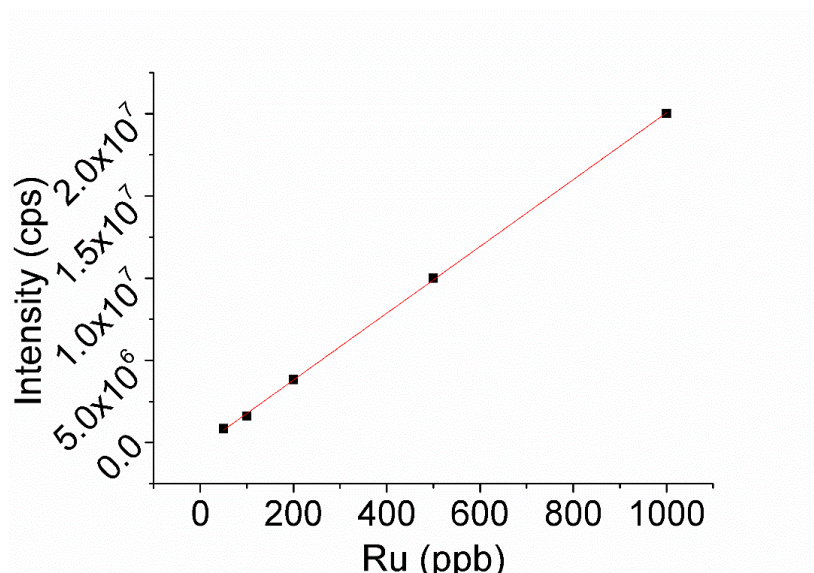

**Figure S8.** Inductively coupled plasma mass spectrometry (ICP-MS): the calibration curve of the Ru. From this curve and the signal intensity related to the Ru in the CPNs allowed to determine a percentage of Ru in the CPNs of  $6.9 \pm 0.2$  wt%.

### 1.7 $^1\text{H}$ NMR and $^{19}\text{F}$ NMR spectra of RuBIS CPNs

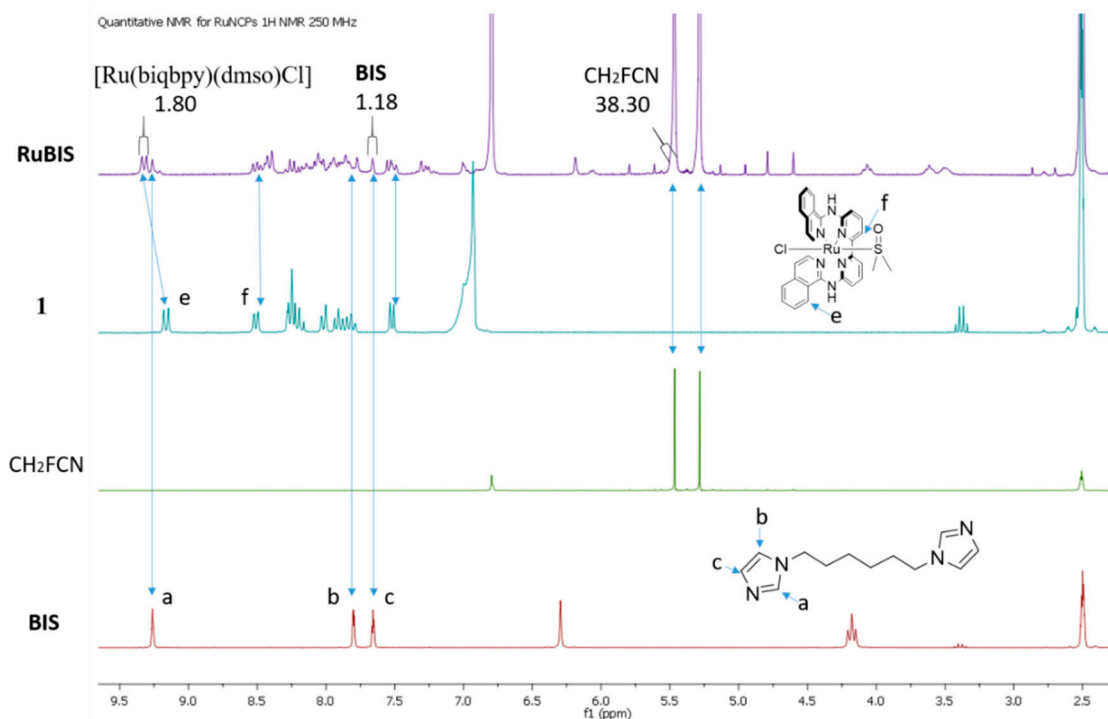

**Figure S9a.**  $^1\text{H}$  NMR spectra of (top to bottom) **RuBIS** CPNs, complex **1**,  $\text{CH}_2\text{FCN}$  (internal reference) and **BIS** ligand. **RuBIS** CPNs were completely dissolved in deuterated dimethyl sulfoxide ( $\text{DMSO-d}_6$ ) containing a small portion of deuterated hydrochloric acid ( $\text{DCl}$ );  $50 \mu\text{L DCl} / \text{mL DMSO-d}_6$ .



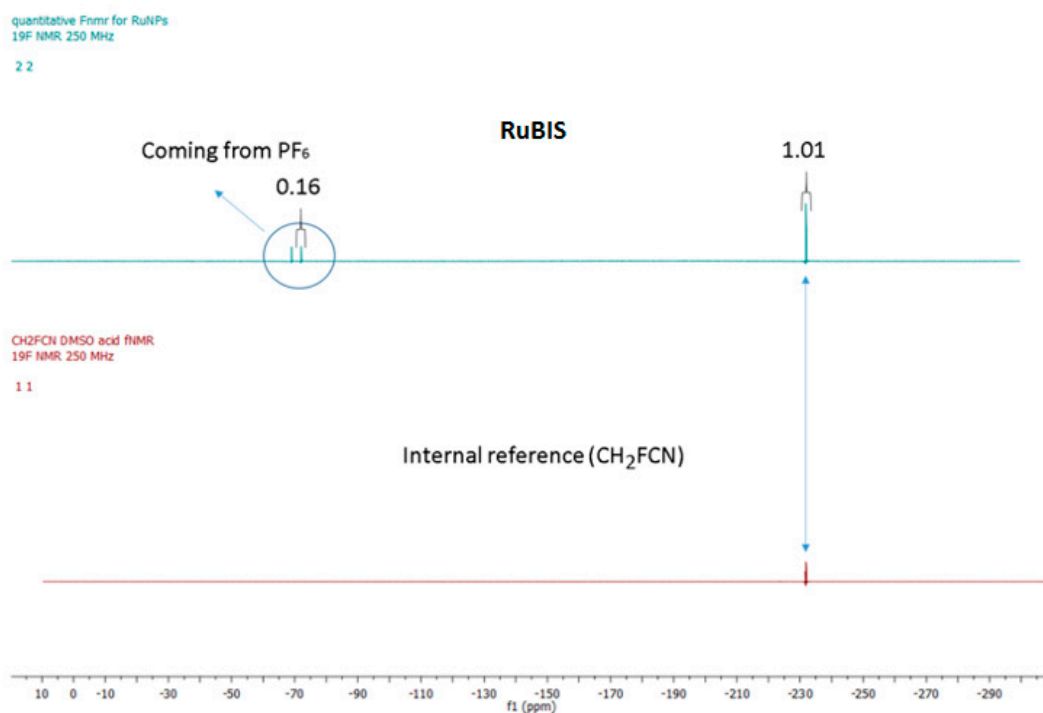

**Figure S9b.**  $^{19}\text{F}$  NMR spectra of **RuBIS** CPNs and  $\text{CH}_2\text{FCN}$  (internal reference). **RuBIS** CPNs were completely dissolved in deuterated dimethyl sulfoxide ( $\text{DMSO-d}_6$ ) containing a small portion of deuterated hydrochloric acid ( $\text{DCl}$ );  $50\ \mu\text{L DCl} / \text{mL DMSO-d}_6$ .

### 1.8 Stability study of RuBIS CPNs in darkness

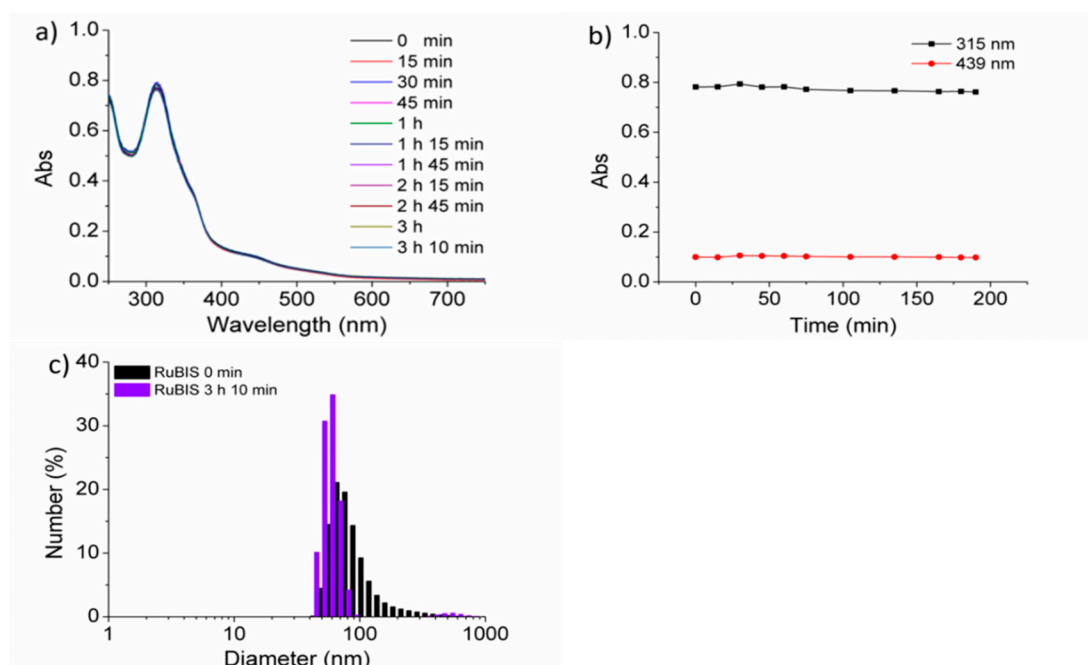

**Figure S10.** a) UV-vis absorption spectra of a PBS suspension of **RuBIS** CPNs in the dark over time. b) Plot of absorbance at  $\lambda_{\text{abs}} = 315$  and  $439\ \text{nm}$  of the **RuBIS** CPNs suspension in the dark. c) DLS tracing results of the **RuBIS** CPNs suspension in PBS solution recorded at 0 min and 3 h 10 min.

## 2. Photoirradiation study

## 2.1 UV-vis spectra (Blue light; 450 nm)

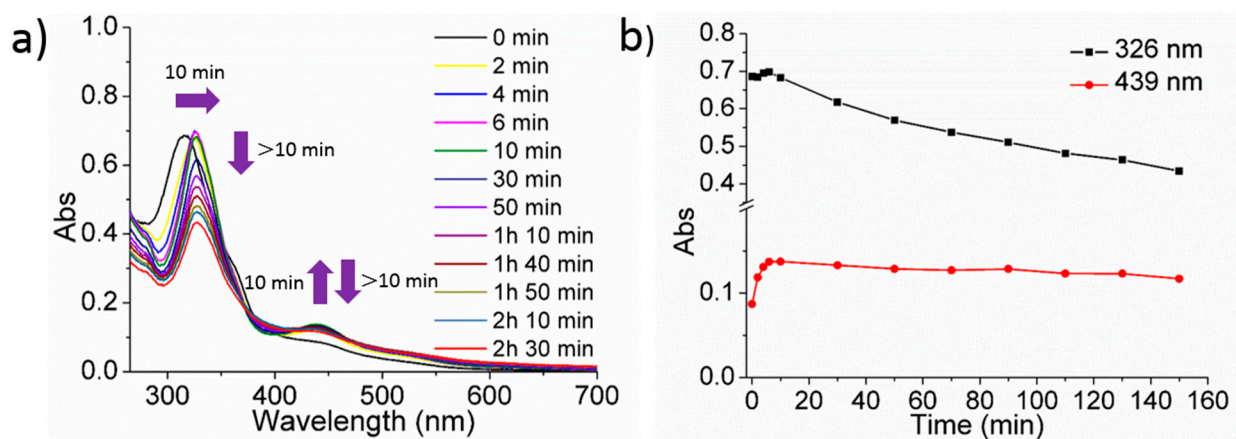

**Figure S11.** a) Evolution of the UV-vis spectra of a PBS suspension of **RuBIS** CPNs, upon blue light irradiation ( $\lambda_{\text{ex}} = 450$  nm). b) Plot of absorbance changes at  $\lambda_{\text{abs}} = 326$  nm (black) and 439 nm (red).

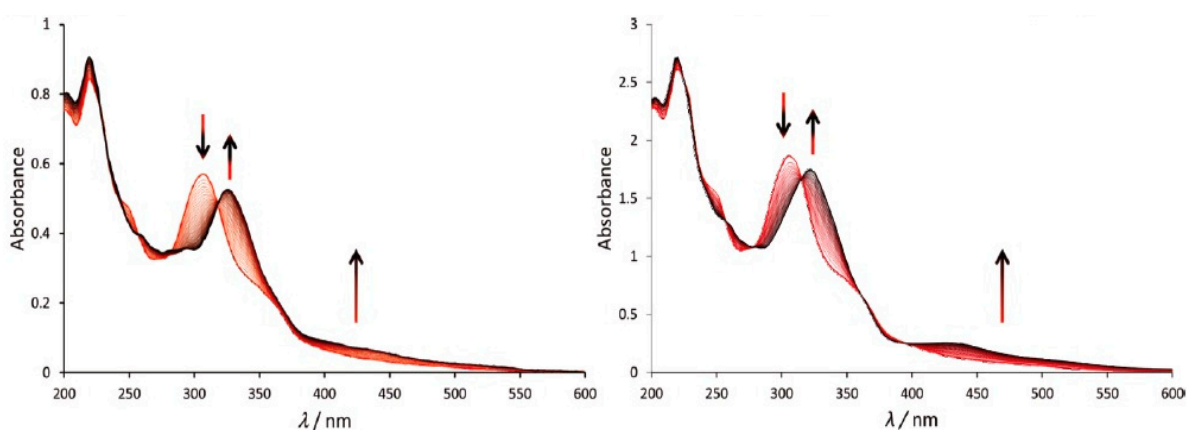

**Figure S12.** Evolution of the UV-vis absorbance spectra of a solution of complex **1**, upon 450 nm blue (left) or 530 nm green light (right) irradiation under argon. Reproduced from Ref. [1] with permission of the copyright holder.



## 2.2 HPLC drug release quantification

### - Elution of the irradiated sample of complex 1 at different concentrations

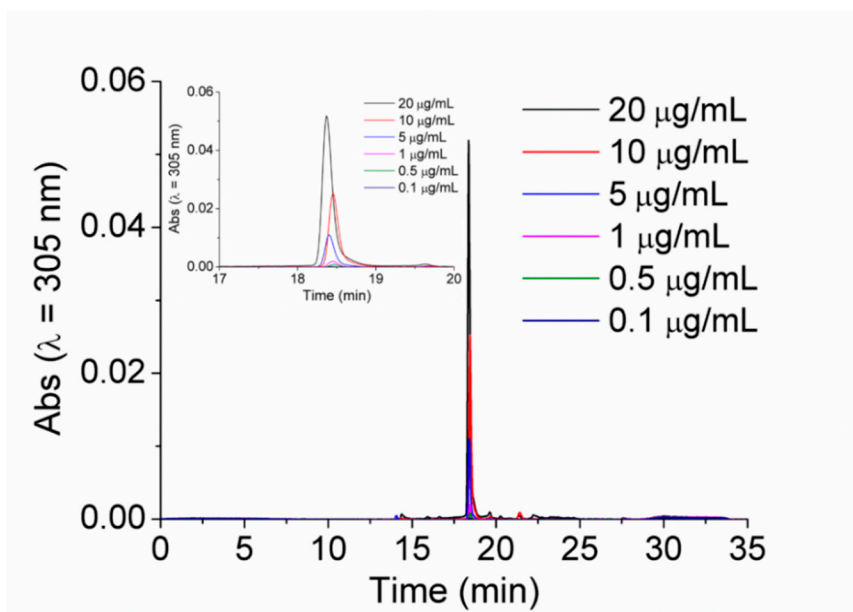

**Figure S13.** The whole chromatogram of fully activated drug  $[\text{Ru}(\text{biqbpy})(\text{H}_2\text{O})_2]^{2+}$  converted from complex 1 at different concentrations. Experimental conditions: 1 mg/mL of complex 1 ( $[\text{Ru}(\text{biqbpy})(\text{dmsO})\text{Cl}]\text{Cl}$ ) in PBS solution under stirring was irradiated with green light (100 mW, 1.1 mW/cm<sup>2</sup>) for 20 h to make sure that Ru complex was fully converted to the drug through photocleavage and photosubstitution process. Due to the nearly 100 % conversion of complex 1 into  $[\text{Ru}(\text{biqbpy})(\text{H}_2\text{O})_2]^{2+}$ , the fully converted drug solution could be used as a stock solution for obtaining the calibration curve.

### - Mass spectrometry of resulting photoproduct $[\text{Ru}(\text{biqbpy})(\text{H}_2\text{O})_2]^{2+}$

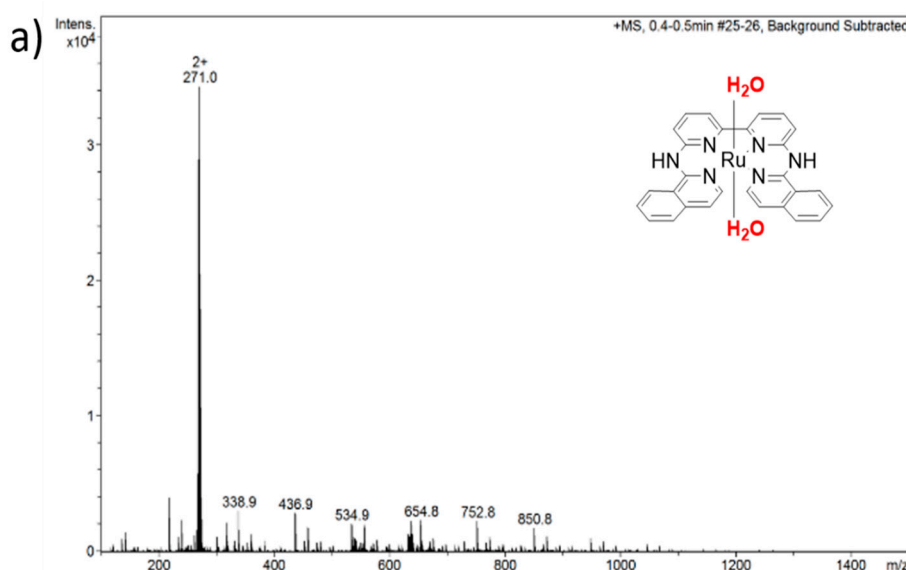

**Figure S14.** a) Mass spectrometry of the fractions: retention times = 18.3 min,  $m/z$  ( $[\text{Ru}(\text{biqbpy})]^{2+}$ ) = 271.0 (calc.  $m/z$  = 270.8).

-  $[\text{Ru}(\text{biqbpy})(\text{H}_2\text{O})_2]^{2+}$  calibration curve

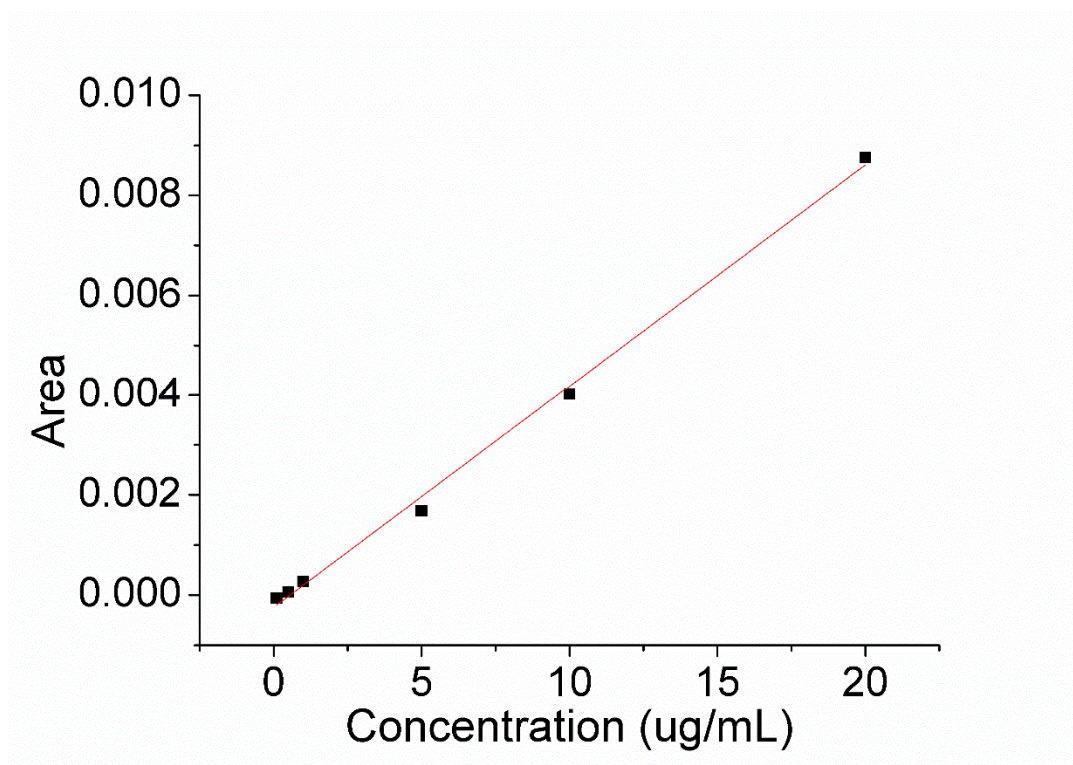

**Figure S15.** The drug ( $[\text{Ru}(\text{biqbpy})(\text{H}_2\text{O})_2]^{2+}$ ) calibration curve using six different concentration solutions were prepared (0.1, 0.5, 1, 5, 10 and 20  $\mu\text{g/mL}$ ).

- HPLC chromatogram of RuBIS drug release at different time

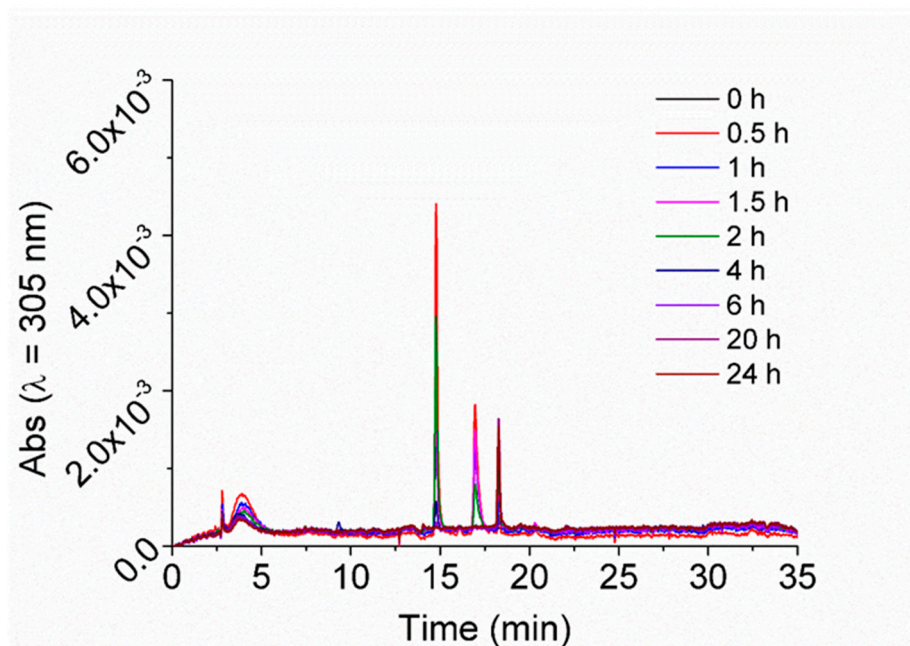

**Figure S16.** The whole chromatogram of the drug release of **RuBIS** CPNs (0 – 35 min).

- Mass spectra of samples with retention time = 14.7 min

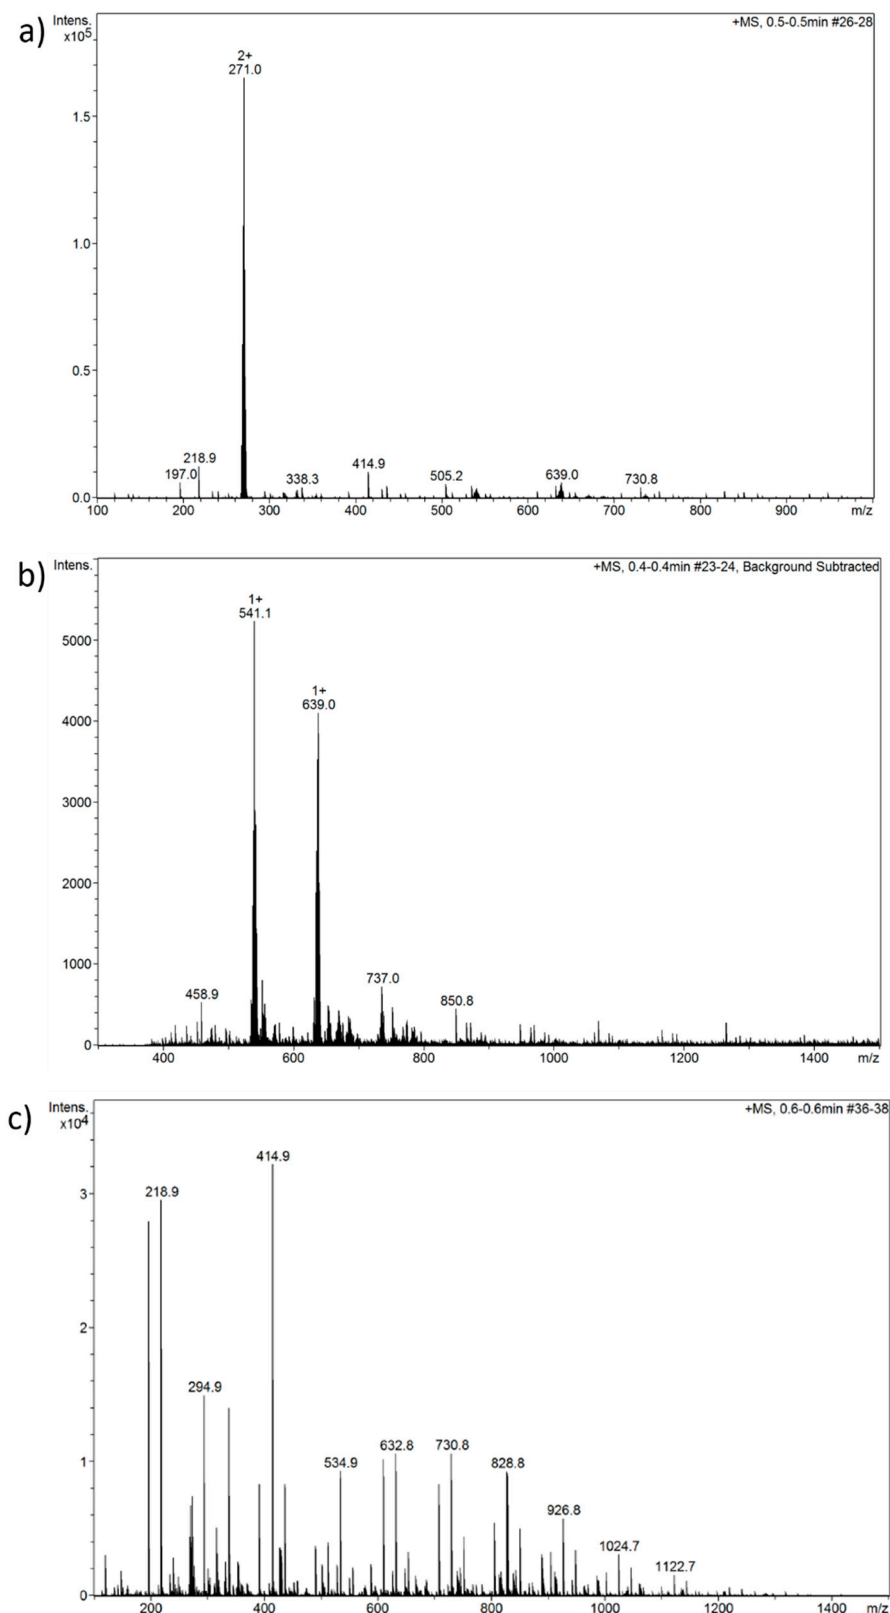

**Figure S17.** a,b) mass spectra of samples with retention time = 14.7 min give peaks at  $m/z$  = 271.0, 541.1, and 828.8 corresponding to  $[\text{Ru}(\text{biqbpy})]^{2+}$  (calc.  $m/z$  = 270.8),  $[\text{Ru}(\text{biqbpy})]^{1+}$  (calc.  $m/z$  = 541.0), and  $\{[\text{Ru}_2(\text{biqbpy})_2\text{bis}(\text{MeOH})_2](\text{PF}_6)_2\}^{2+}$  (calc.  $m/z$  = 828.7) respectively; c) mass spectra of sample with retention time = 16.9 min,  $2^+$  with  $m/z$  = 828.8 (calc.  $m/z$  = 828.7). \* The presence of MeOH in  $\{[\text{Ru}_2(\text{biqbpy})_2\text{bis}(\text{MeOH})_2](\text{PF}_6)_2\}^{2+}$  specie come from MeOH solvent used for sample dissolution.

### 2.3 UV-vis absorbance spectra of a complex 2 solution after green light irradiation

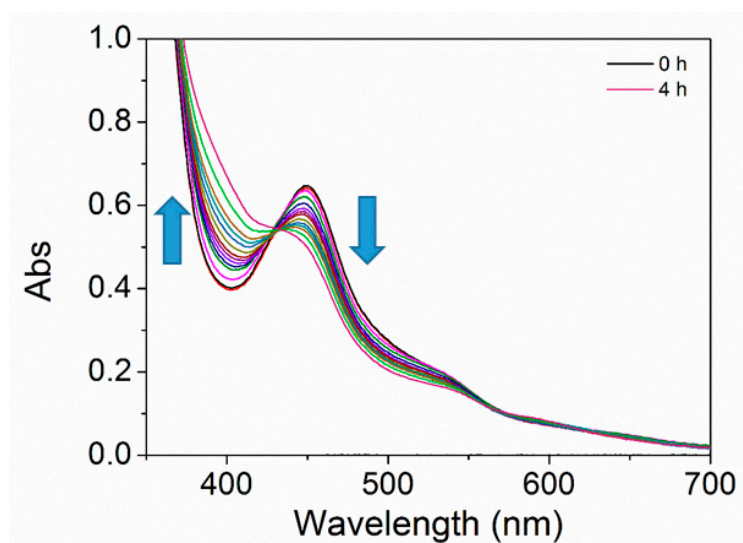

**Figure S18.** Evolution of the UV-vis absorbance spectra of a solution of complex **2**, upon green light ( $\lambda_{\text{exc}} = 532 \text{ nm}$ ,  $0.42 \text{ W/cm}^2$ ) irradiation under argon.

### 3. *In vitro* studies and $^1\text{O}_2$ generation studies for RuBIS CPNs and **2** under normoxic conditions

#### 3.1 Cytotoxicity assays with and without green light (520 nm) irradiation

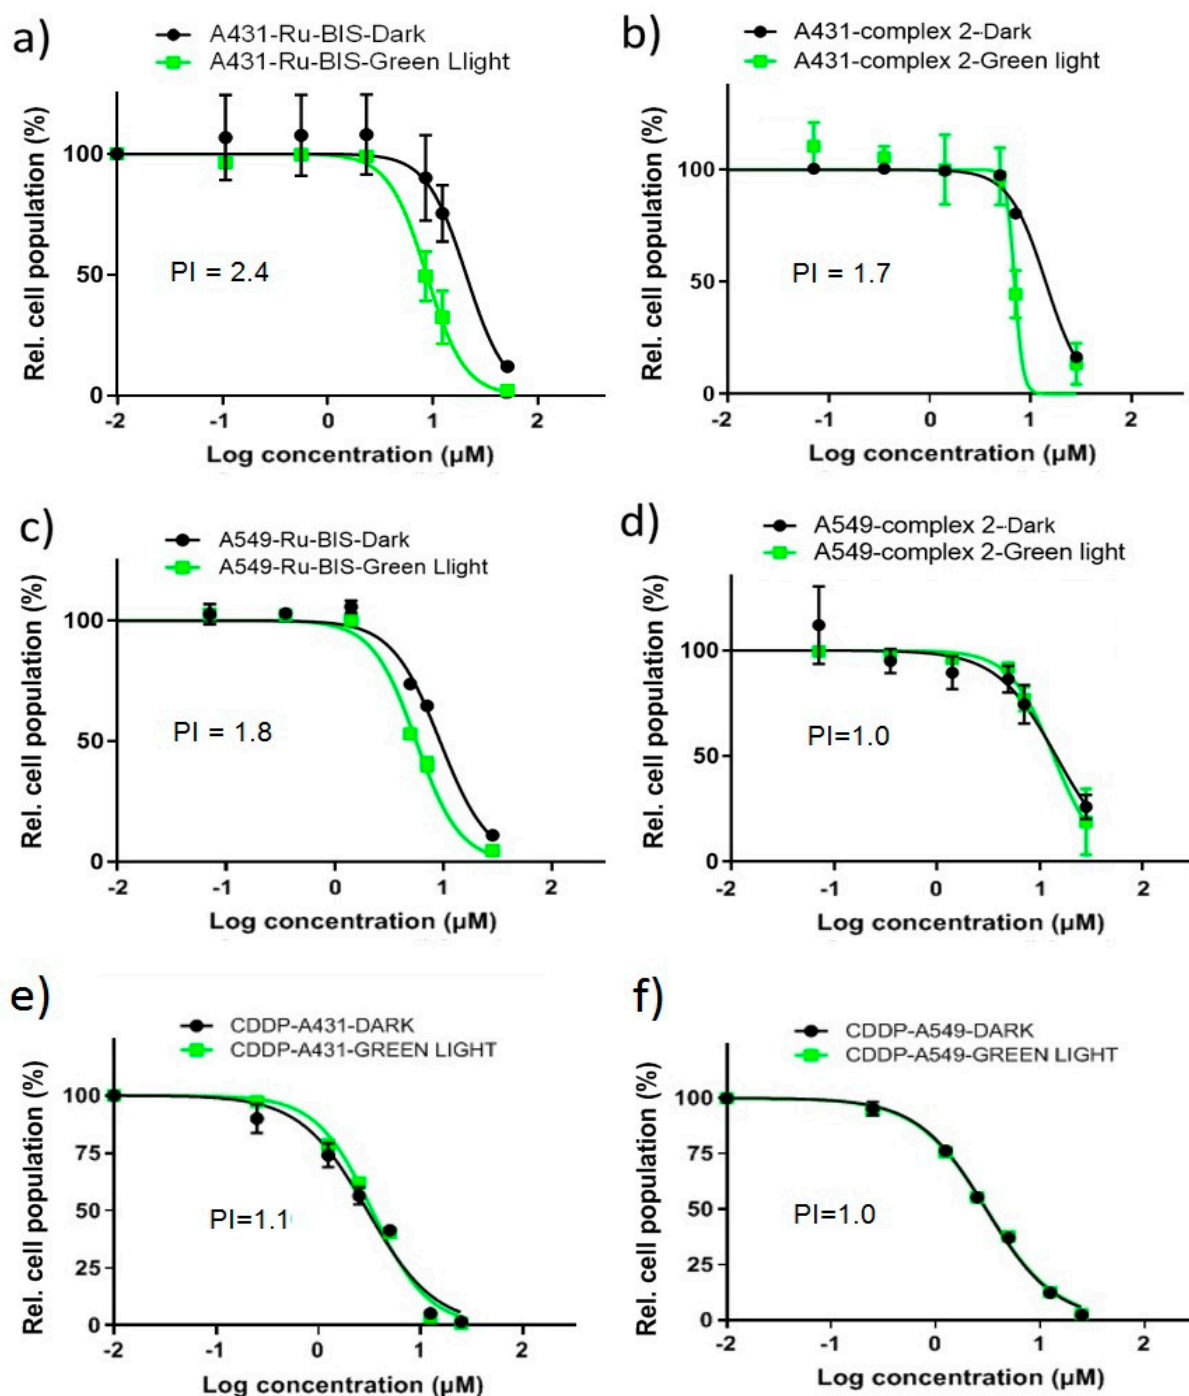

**Figure S19.** Comparative dose-response curves and calculated phototoxicity index (PI) after 1h irradiation with green light (green data points) and in the dark (black data points) for: A431 cell line in presence of **RuBIS** CPNs (a) or the complex **2** (b); A549 cell line in presence of **RuBIS** CPNs (c) or the complex **2** (d); and cisplatin (CDDP) cytotoxicity dose-response curves for A431 (e) and A549 (f) cell lines. Phototoxicity assay outline: cells were incubated in the dark for 48 h, and the plates were irradiated for 60 min with green light ( $\lambda_{\text{exc}} = 520 \text{ nm}$ , power density  $10.92 \text{ mW/cm}^2$ , light dose =  $39.3 \text{ J/cm}^2$ ). SRB assay was performed at  $t=96\text{h}$ . Data points represent the average of triplicates (confidence interval of 95% in  $M$ ).

### 3.2 Cytotoxicity of Bis and 1-methylimidazole free ligands



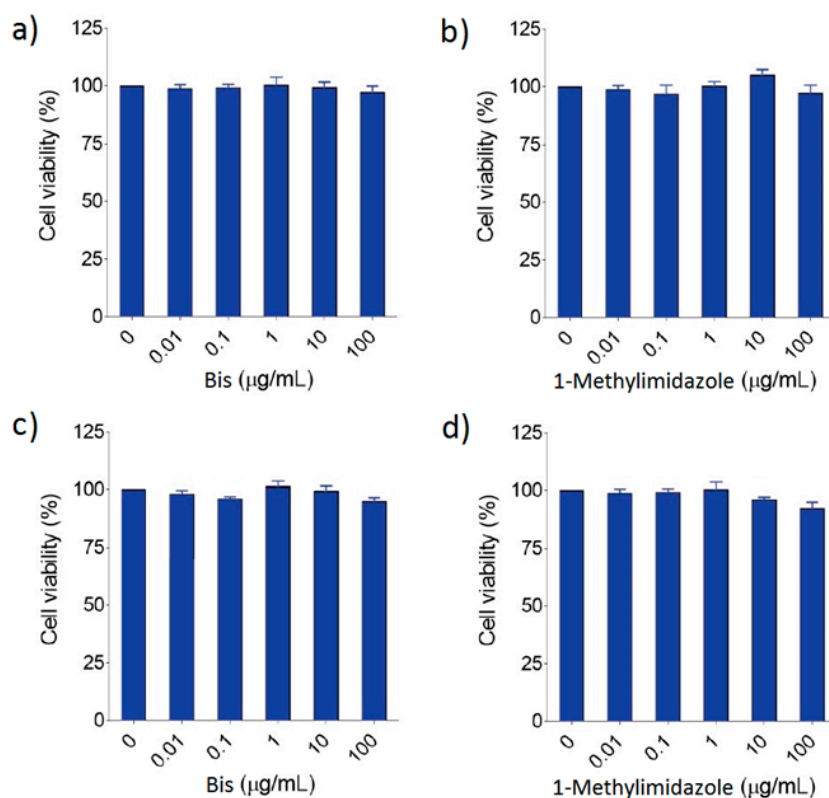

**Figure S20.** Cell viability studies of Bis and 1-methylimidazole free ligands in a-b) non-malignant human fibroblast cells (1Br3G) and c-d) HeLa cell lines at different concentrations ranging from 0 to 100  $\mu\text{g/mL}$ . Cell viability was evaluated at 48h by a resazurin-based assay using the PrestoBlue cell viability reagent.

### 3.3 $^1\text{O}_2$ studies for RuBIS CPNs and 2 under normoxic conditions with and without green light (520 nm) irradiation

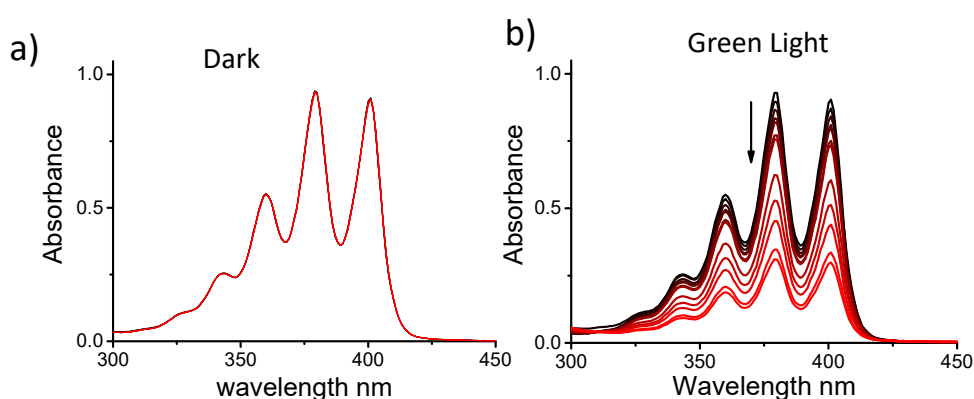

**Figure S21.** Absorption spectral changes of ABMDMA in the dark (a) or following green light irradiation with the light of dose  $39.3 \text{ J/cm}^2$  (b) in the presence of Rose Bengal ( $0.1 \mu\text{M}$ ).

### 3.3 Determining the required irradiation time for RuBIS CPNs and complex 2 activation

Mock irradiation experiments were performed in the conditions of the cytotoxicity assay, but in absence of cells, to determine the irradiation time necessary to activate **RuBIS** CPNs and complex **2** in the cytotoxicity assay. The highest concentration ( $50 \mu\text{g/mL}$ ) of **RuBIS** CPNs was added ( $200 \mu\text{L}$ ) in transparent 96-well plates. Samples were irradiated for 60 min with green light ( $\lambda_{\text{exc}} = 520 \text{ nm}$ ,  $39.3 \text{ J/cm}^2$ ) and absorption changes at 440 and 390 nm for



**RuBIS** CPNs and complex **2** was followed vs. irradiation time. The complete activation of both compounds was achieved after 60 min of continuous irradiation (light dose 39.3 J/cm<sup>2</sup>).

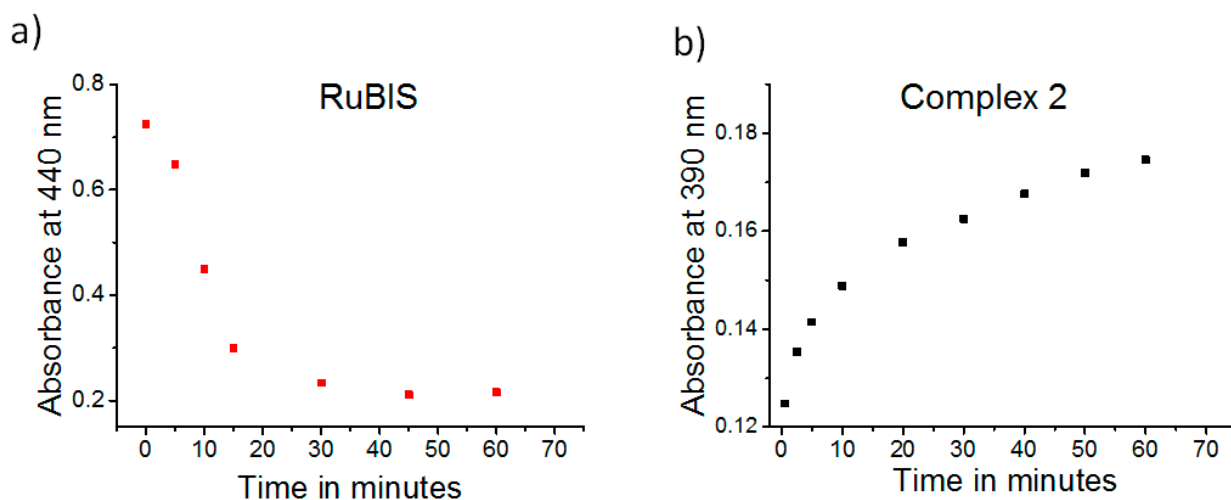

**Figure S22.** Mock irradiation studies for (a) **RuBIS** CPNs and (b) complex **2** was conducted in cell culturing Opti-MEM media at 37 °C in air without the cells to know the light intensity and duration of time for the complete activation of these compounds. Conditions: 50 µg/mL of **RuBIS** CPNs or complex **2** (200 µL), light irradiation  $\lambda_{exc}$  = 520 nm, 39.3 J.cm<sup>-2</sup>.

#### Reference:

1. van Rixel, V.H.S.; Siewert, B.; Hopkins, S.L.; Askes, S.H.C.; Busemann, A.; Siegler, M.A.; Bonnet, S. Green light-induced apoptosis in cancer cells by a tetrapyrridyl ruthenium prodrug offering two trans coordination sites. *Chem Sci* **2016**, 7, 4922-4929.
